# Supplementary material for: A novel mechanism for Prp5 function in prespliceosome formation and proofreading the branch site sequence
Source: PubMed Central journal article supplement — Genes Dev. 2015 Jan 1;29(1):81–93. doi: 10.1101/gad.253708.114 (PMC4281567; doi:10.1101/gad.253708.114), 2015-01-01
Supplement: supp_29.1.81_SuppFigures.pdf [file supp_29.1.81_SuppFigures.pdf]

A

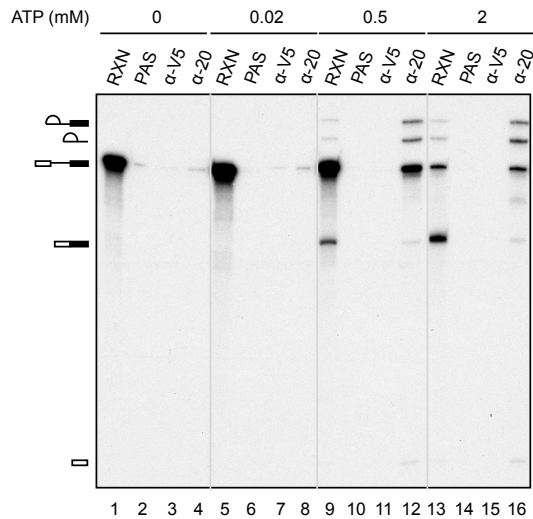

B

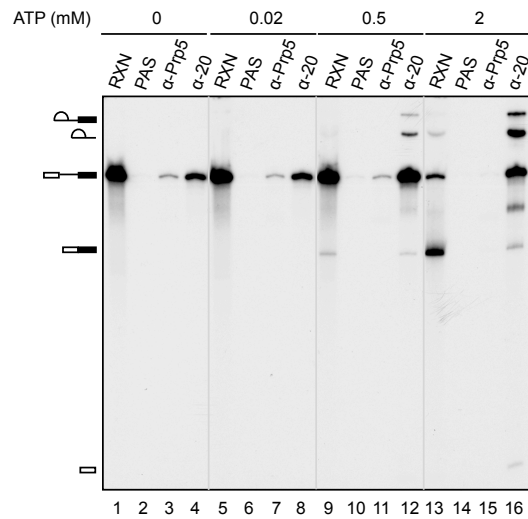

**Figure S1. Prp5 is not stably associated with the spliceosome.** Splicing reactions were carried out in the presence of 0 mM (lanes 1 to 4), 0.02 mM (lanes 5 to 8), 0.5 mM (lanes 9 to 12) or 2 mM (lanes 13 to 16) ATP (A) in Prp5-V5 extracts, and the reaction mixtures were precipitated with anti-Ntc20 or anti-V5 antibody, or (B) in regular extracts, and the reaction mixtures were precipitated with anti-Ntc20 or anti-Prp5 antibody. RXN, 1/10 of the reaction mixture; PAS, protein A-Sepharose;  $\alpha$ -20, anti-Ntc20 antibody.

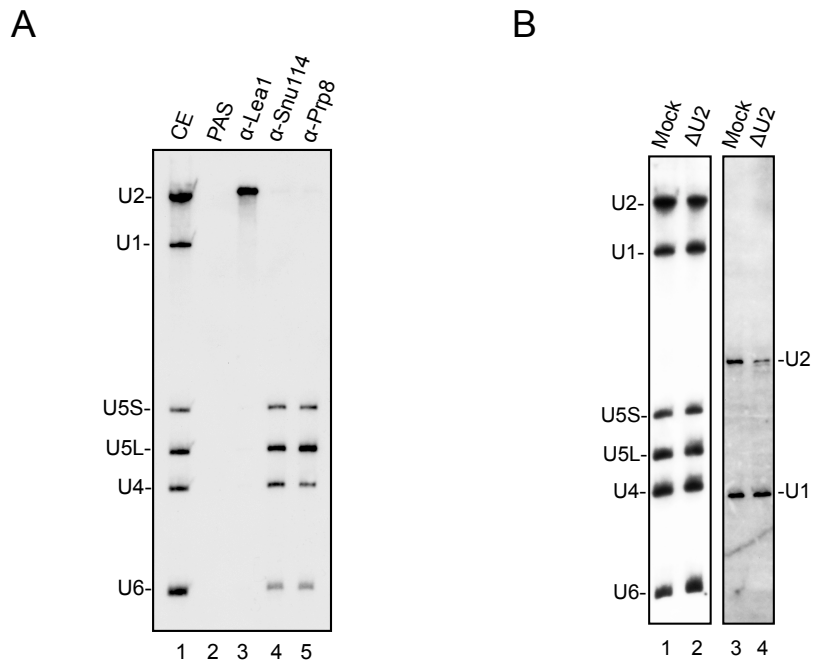

**Figure S2. Analysis of U2 snRNA.** (A) Anti-Lea1 antibody coprecipitates U2 snRNA. Splicing extracts were precipitated with antibodies against Lea1, Snu114 or Prp8, and probed with five snRNAs. CE, cell extract; PAS, protein A-Sepharose. (B) Depletion of U2 snRNA by oligo-directed RNase H cleavage. Splicing extracts were treated with U2-specific oligonucleotide U2-C, and total RNA was isolated for Northern blotting probed with five snRNAs. Lanes 3 and 4 contained the same samples as lanes 1 and 2, but with longer electrophoresis time.  $\Delta$ U2, U2-C treated.

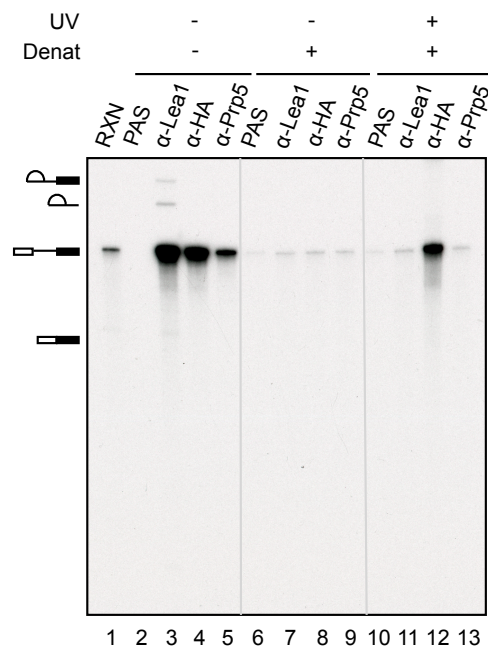

**Figure S3. Prp5 does not directly interact with the pre-mRNA.** Splicing reactions were carried out with U257C pre-mRNA in Hsh155-HA extracts, and the reaction mixtures were separated into three aliquots. One aliquot was not further treated (lanes 2-5), another was subjected to denaturation (lanes 6 to 9), and the third was irradiated with UV<sub>254 nm</sub> followed by denaturation (lanes 10 to 13). The reaction mixtures were then precipitated with anti-Lea1, anti-HA or anti-Prp5 antibody. Denat, denaturation.

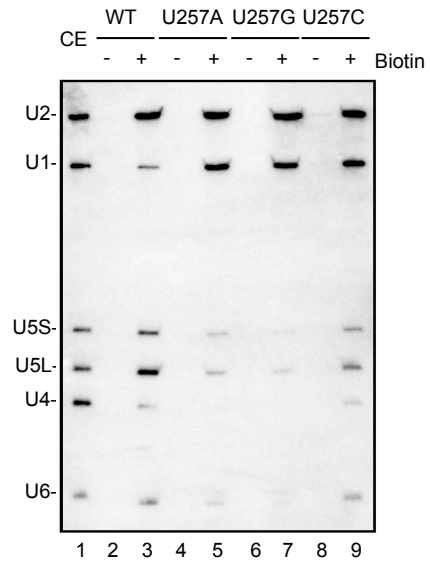

**Figure S4. Spliceosomes assembled on U257 mutant pre-mRNAs do not contain tri-snRNP.** Spliceosomes assembled on wild-type, U257A, U257G and U257C biotinylated pre-mRNAs were pulled down with streptavidin Sepharose, and the components were analyzed by Northern blotting probed with five snRNAs.

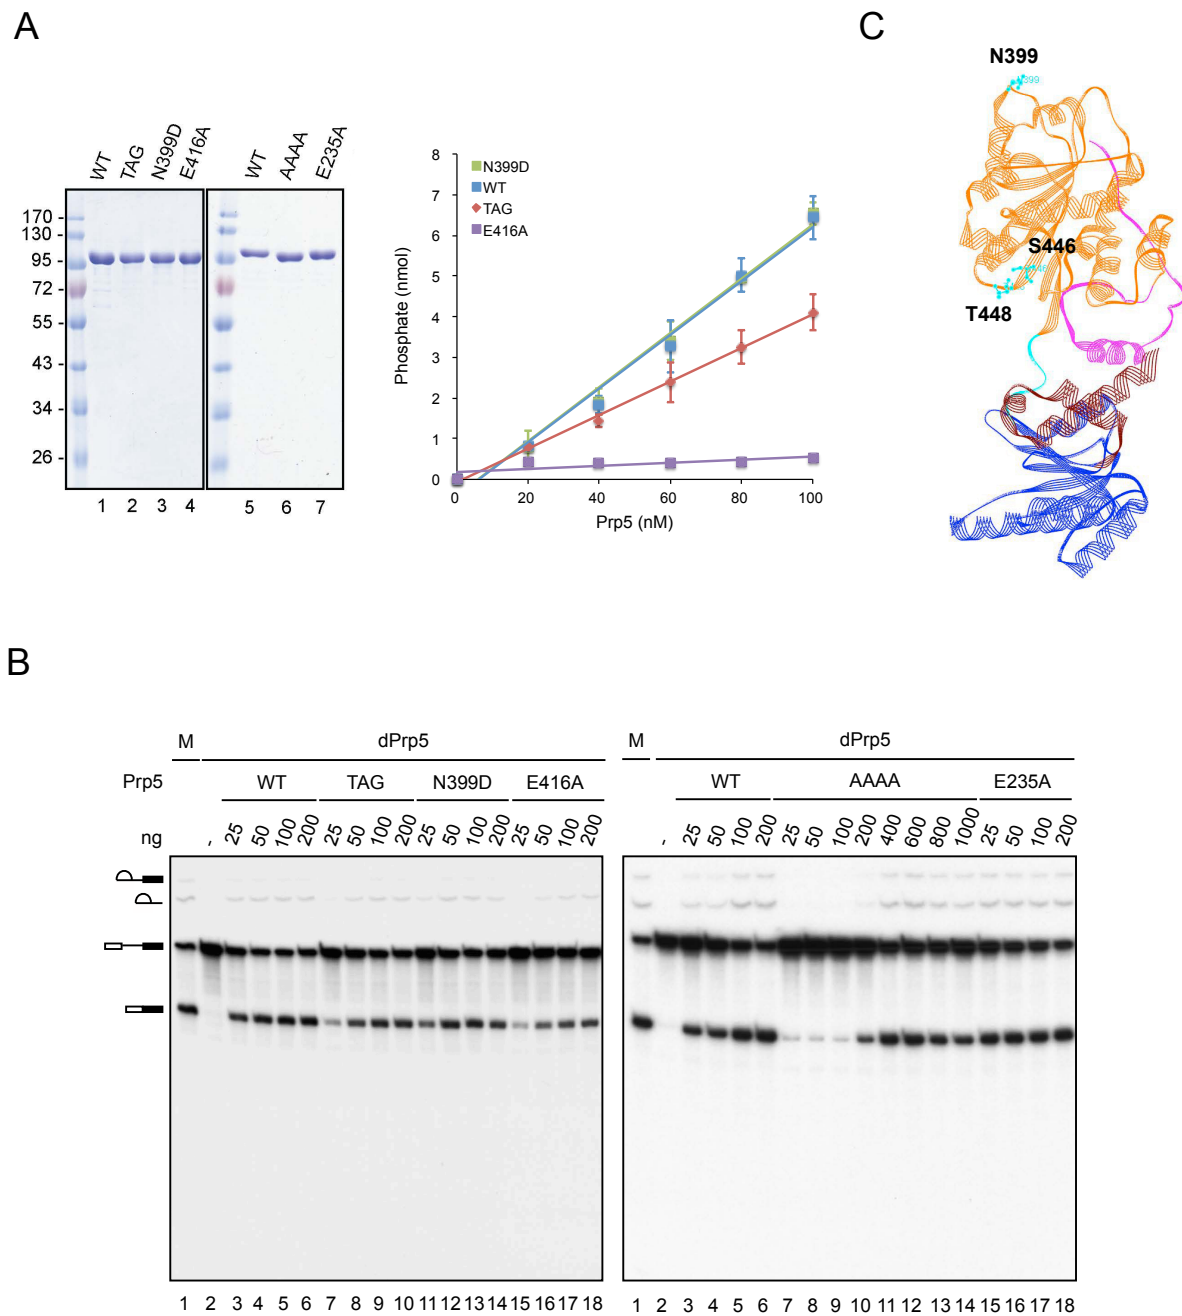

**Figure S5. Analysis of recombinant Prp5 mutant proteins and the location of the mutations.** (A) Purified recombinant wild-type and mutant Prp5-V5 proteins stained with Coomassie blue, and ATPase assays of wild-type, N399D and TAG mutants of Prp5. (B) Complementation assays of recombinant wild-type and mutant Prp5 proteins. Purified recombinant Prp5 proteins were added in various amounts to Prp5-depleted *cus2Δ* extracts for splicing complementation. (C) Crystal structure of a Prp5 fragment from residue 206 to 699, with N399 and SAT motif marked. (Zhang et al., 2013).
